# Supplementary material for: Machine learning-based approaches for identifying human blood cells harboring CRISPR-mediated fetal chromatin domain ablations
Source: Sci Rep. 2022 Jan 27;12:1481. doi: 10.1038/s41598-022-05575-3 (PMC8795181; doi:10.1038/s41598-022-05575-3)
Supplement: Supplementary file 9 — Supplementary Table 9. [file 41598_2022_5575_MOESM9_ESM.xlsx]

## Sheet: test1
treen number	mean accuracy	standard deviation of accuracy
7	0.800857	0.0029241
8	0.801498	0.00235485
9	0.803775	0.00193516
10	0.80502	0.00169846
11	0.806543	0.00227725
12	0.806771	0.00233355
13	0.80775	0.0024944
14	0.808473	0.00216822
15	0.809121	0.00253775
16	0.810297	0.00289818
17	0.810446	0.00243149
18	0.810869	0.00256999
19	0.810961	0.00238656
20	0.810997	0.00215504
21	0.811242	0.00225087
22	0.811764	0.00240329
23	0.812471	0.00206689
24	0.81225	0.00285269
25	0.811972	0.00247239
26	0.812613	0.0025067
27	0.81296	0.00219072
28	0.812554	0.00204257
29	0.812683	0.00207325
30	0.813314	0.00204417
31	0.813294	0.00202144
32	0.813443	0.00213115
33	0.813561	0.00236019
34	0.814348	0.0023746
35	0.813561	0.00191125
36	0.813885	0.00210837
37	0.813918	0.00233182
38	0.814424	0.00231131
39	0.814262	0.00262995
40	0.814596	0.00205704
41	0.814741	0.00233446
42	0.81446	0.00215637
43	0.813905	0.00199508
44	0.814834	0.0022699
45	0.814734	0.00212121
46	0.815313	0.00228485
47	0.814682	0.00188396
48	0.815104	0.00235198
49	0.81451	0.00288591
50	0.81524	0.00212129
51	0.814744	0.00210204
52	0.814867	0.00222724
53	0.815025	0.00172467
54	0.815078	0.00273326
55	0.814893	0.0018881
56	0.815498	0.00252728
57	0.814837	0.00225436
58	0.815233	0.0022877
59	0.815128	0.00236668
60	0.815683	0.00224894
61	0.815471	0.0022105
62	0.815726	0.00272802
63	0.815045	0.0022287
64	0.815527	0.00223116
65	0.815567	0.00257528
66	0.815729	0.00240815
67	0.816007	0.00236889
68	0.815157	0.00219167
69	0.815442	0.00238208
70	0.816109	0.00229783
71	0.815256	0.00229758
72	0.815603	0.00249299
73	0.81527	0.00198205
74	0.81594	0.00265203
75	0.815818	0.00228747
76	0.816036	0.00263464
77	0.815478	0.00220714
78	0.816043	0.00268839
79	0.815623	0.00261521
80	0.81563	0.0022174
81	0.815841	0.00245408
82	0.816139	0.0026378
83	0.815907	0.00246691
84	0.816016	0.00281843
85	0.816178	0.00242565
86	0.816231	0.00209099
87	0.816046	0.00278342
88	0.815749	0.00224585
89	0.816211	0.00228612
90	0.81599	0.00231374
91	0.815878	0.0022483
92	0.815888	0.00270626
93	0.81634	0.00242084
94	0.816162	0.00220653
95	0.815983	0.00219644
96	0.816155	0.00243052
97	0.816436	0.00226716
98	0.816274	0.00245127
99	0.816132	0.00283948
100	0.815868	0.00269546
Supplementary Table 9. The mean and standard deviation values of 10-fold cross validation accuracy using the random forest algorithm.
